# Supplementary material for: From metal to cathode material: in situ formation of LiCoO2 with enhanced cycling performance and suppressed phase transition
Source: Royal Society of Chemistry journal article supplement (doi:10.1039/d3ta00999h), 2023-01-01
Supplement: d3ta00999h1.pdf [file d3ta00999h1.pdf]

## Supporting Information

### From Metal to Cathode Material: in situ Formation of LiCoO<sub>2</sub> with Enhanced Cycling Performance and Suppressed Phase Transition

Longhao Cao<sup>a, b</sup>, Hui Wang<sup>b</sup>, Ziyin Guo<sup>b</sup>, Jing Zhang<sup>b</sup>, Xiaosong Zhang<sup>b</sup>, Cancan Peng<sup>b</sup>, Jingxiong Yu<sup>b</sup>,

Ya-Jun Cheng<sup>\*b</sup>, Yonggao Xia<sup>\*b, c</sup>

---

<sup>a</sup> School of Materials Science and Chemical Engineering, Ningbo University, Ningbo, 315211, Zhejiang Province, P. R. China.

<sup>b</sup> Ningbo Institute of Materials Technology & Engineering, Chinese Academy of Sciences, 1219 Zhongguan West Rd, Ningbo, 315201, Zhejiang, P. R. China.  
chengyj@nimte.ac.cn

<sup>c</sup> Center of Materials Science and Optoelectronics Engineering, University of Chinese Academy of Sciences, 19A Yuquan Rd, Shijingshan District, Beijing, 100049, P. R. China. Email: xiayg@nimte.ac.cn

† Electronic Supplementary Information (ESI) available: See

DOI: 10.1039/x0xx00000x

**Table S1.** Tap density and Compacted density of the M-LCO and C-LCO powder.

|                       | Tap density<br>(g cm <sup>-3</sup> )<br>C-LCO | Tap density<br>(g cm <sup>-3</sup> )<br>M-LCO | Compacted density<br>(g cm <sup>-3</sup> )<br>C-LCO | Compacted density<br>(g cm <sup>-3</sup> )<br>M-LCO |
|-----------------------|-----------------------------------------------|-----------------------------------------------|-----------------------------------------------------|-----------------------------------------------------|
| Test 1                | 2.183                                         | 2.336                                         | 3.744                                               | 4.215                                               |
| Test 2                | 2.217                                         | 2.357                                         | 3.886                                               | 4.348                                               |
| Test 3                | 2.221                                         | 2.361                                         | 3.974                                               | 4.42                                                |
| Average<br>value      | 2.207                                         | 2.351                                         | 3.868                                               | 4.328                                               |
| Standard<br>deviation | 0.021                                         | 0.013                                         | 0.116                                               | 0.104                                               |

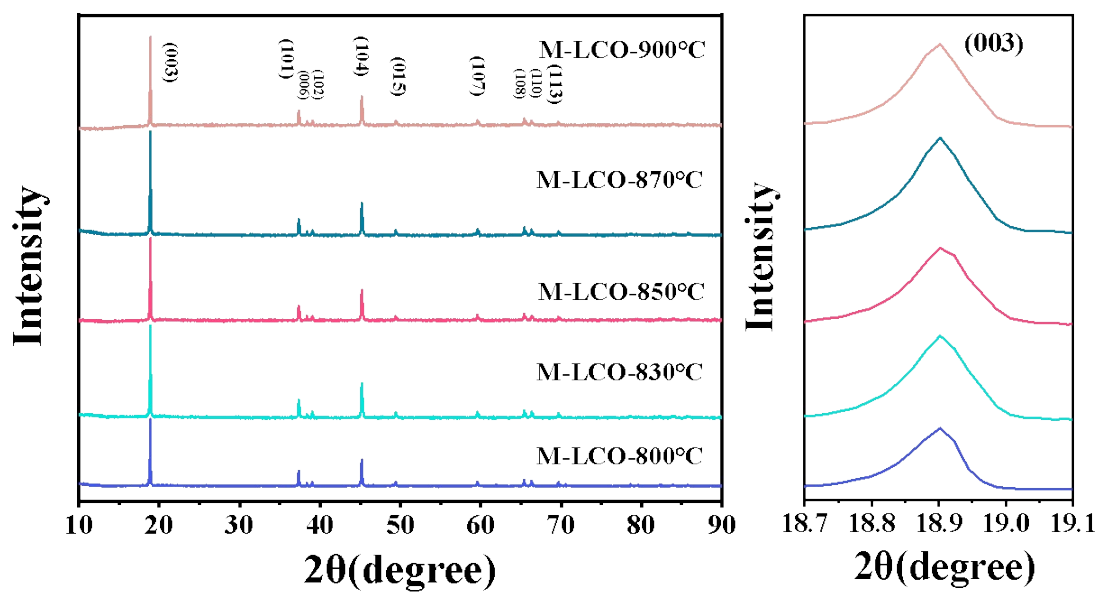

Fig. S1 XRD patterns of the M-LCO powder annealed at 800 °C, 830 °C, 850 °C, 870 °C, and 900 °C, respectively.

**Table S2.** The results of Rietveld refinement on the XRD data of the samples.

| Sample       | a        | c         | (003)/(104) | Co in Li (%) |
|--------------|----------|-----------|-------------|--------------|
| C-LCO        | 2.815797 | 14.056887 | 2.23        | 1.06         |
| M-LCO-850 °C | 2.821124 | 14.087249 | 1.79        | 3.4          |

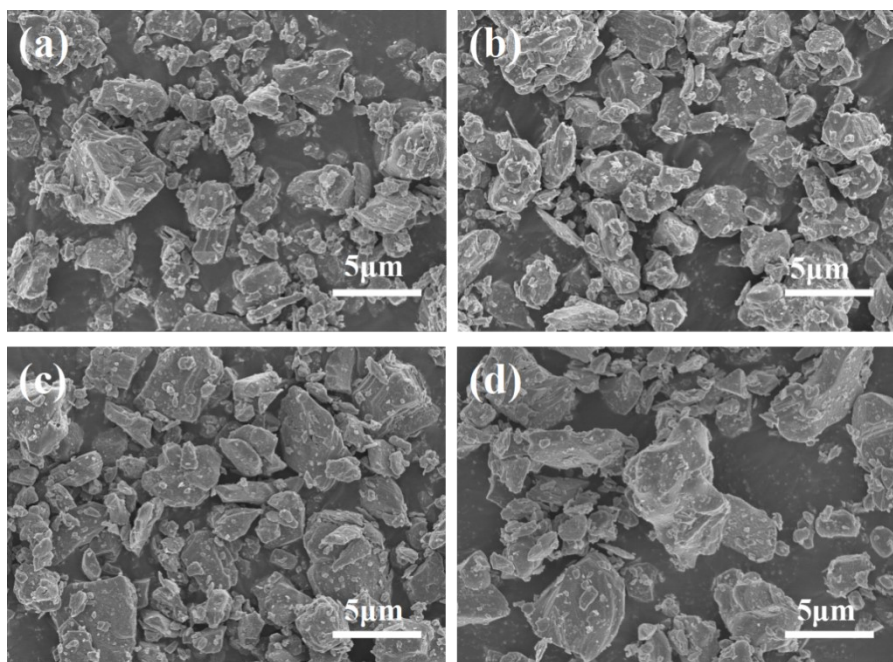

**Fig. S2** SEM image of the M-LCO powder annealed at (a) 800 °C; (b) 830 °C, (c) 870 °C and (d) 900 °C.

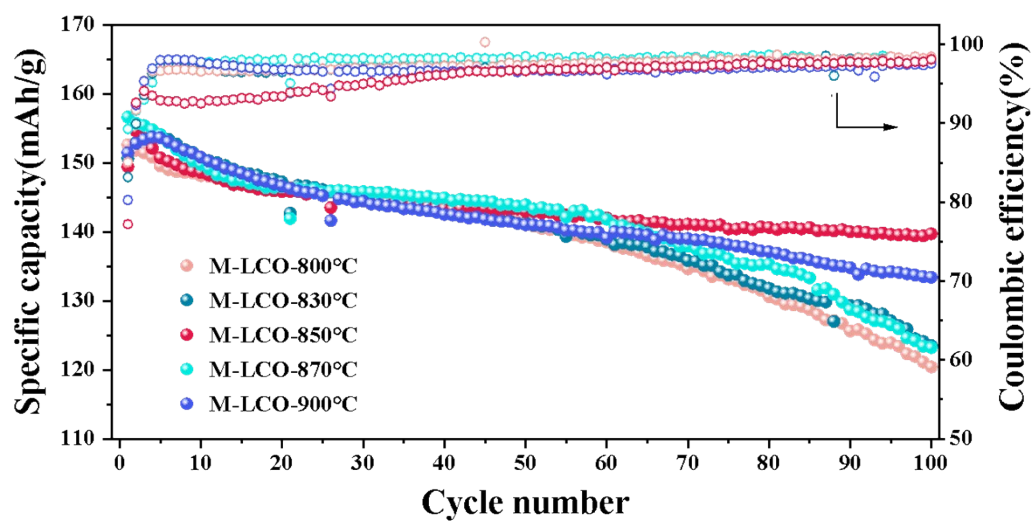

Fig. S3 Discharge specific capacity and Coulombic efficiency curves of M-LCO-850 °C annealed at 800 °C-900 °C, respectively.

**Table S3.** Discharge specific capacities of C-LCO and M-LCO-850 °C at different rates.

| Sample       | Discharge specific capacity (mAhg <sup>-1</sup> ) at 0.1 C | Discharge specific capacity (mAhg <sup>-1</sup> ) at 0.2 C | Discharge specific capacity (mAhg <sup>-1</sup> ) at 0.5 C | Discharge specific capacity (mAhg <sup>-1</sup> ) at 1 C | Discharge specific capacity (mAhg <sup>-1</sup> ) at 2 C | Discharge specific capacity (mAhg <sup>-1</sup> ) at 5 C |
|--------------|------------------------------------------------------------|------------------------------------------------------------|------------------------------------------------------------|----------------------------------------------------------|----------------------------------------------------------|----------------------------------------------------------|
| C-LCO        | 152                                                        | 150                                                        | 140                                                        | 130                                                      | 116                                                      | 86                                                       |
| M-LCO-850 °C | 160                                                        | 161                                                        | 149                                                        | 143                                                      | 130                                                      | 98                                                       |

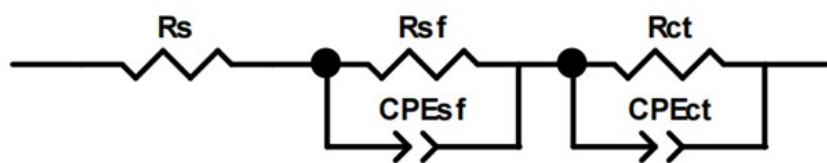

**Fig. S4** Equivalent circuit diagram used to fit the EIS profiles of C-LCO and M-LCO-850 °C after 100 cycles.



**Table S4.** Fitted  $R_{sf}$  and  $R_{ct}$  values of the EIS after 100 cycles.

| Sample       | $R_{sf}/\Omega$ | $R_{ct}/\Omega$ |
|--------------|-----------------|-----------------|
| C-LCO        | 47.1            | 463.7           |
| M-LCO-850 °C | 27.34           | 297.8           |

**Table S5.** Calculated apparent diffusion coefficient  $D_{Li^+}$  of the M-LCO-850 °C and C-LCO cathodes.

| Sample                    | 0.2 mV s <sup>-1</sup>                                   | 0.4mV s <sup>-1</sup>                                    | 0.6 mV s <sup>-1</sup>                                   | 0.8 mV s <sup>-1</sup>                                   |
|---------------------------|----------------------------------------------------------|----------------------------------------------------------|----------------------------------------------------------|----------------------------------------------------------|
| $D_{Li^+}$ (C-LCO)        | $4.03 \times 10^{-9}$<br>cm <sup>2</sup> s <sup>-1</sup> | $6.49 \times 10^{-9}$<br>cm <sup>2</sup> s <sup>-1</sup> | $7.13 \times 10^{-9}$<br>cm <sup>2</sup> s <sup>-1</sup> | $6.74 \times 10^{-9}$<br>cm <sup>2</sup> s <sup>-1</sup> |
| $D_{Li^+}$ (M-LCO-850 °C) | $5.66 \times 10^{-9}$<br>cm <sup>2</sup> s <sup>-1</sup> | $9 \times 10^{-9}$ cm <sup>2</sup><br>s <sup>-1</sup>    | $1.13 \times 10^{-8}$<br>cm <sup>2</sup> s <sup>-1</sup> | $9.77 \times 10^{-9}$<br>cm <sup>2</sup> s <sup>-1</sup> |
